# Supplementary material for: Risks of Acute Cholecystitis, Acute Pancreatitis, and Acute Appendicitis in Patients with Dengue Fever: A Population-Based Cohort Study in Taiwan
Source: PubMed Central journal article supplement — Infect Dis Ther. 2023 Jun 10;12(6):1677–93. doi: 10.1007/s40121-023-00821-1 (PMC10281938; doi:10.1007/s40121-023-00821-1), 2023-06-10
Supplement: 40121_2023_821_MOESM1_ESM.pdf [file 40121_2023_821_MOESM1_ESM.pdf]

Supplementary Material

**TITLE:** Risks of acute cholecystitis, acute pancreatitis, and acute appendicitis in patients with dengue fever: a population-based cohort study in Taiwan

**AUTHOR LIST:** Hsin-I Shih <sup>1,2,3</sup>, Chia-Yu Chi<sup>4,5</sup>, Yu-Ping Wang<sup>3,4</sup>, Yu-Wen Chien<sup>3,6</sup>

**AUTHOR AFFILIATIONS:**

<sup>1</sup>Department of Emergency Medicine, National Cheng Kung University Hospital, College of Medicine, National Cheng Kung University, Tainan, Taiwan

<sup>2</sup>School of Medicine, College of Medicine, National Cheng Kung University, Tainan, Taiwan

<sup>3</sup>Department of Public Health, College of Medicine, National Cheng Kung University, Tainan, Taiwan

<sup>4</sup>National Mosquito-Borne Diseases Control Research Center, National Health Research Institutes, Miaoli County, Taiwan

<sup>5</sup>Department of Microbiology & Immunology, College of Medicine, National Cheng Kung University, Tainan, Taiwan

<sup>6</sup>Department of Occupational and Environmental Medicine, National Cheng Kung University Hospital, College of Medicine, National Cheng Kung University, Tainan, Taiwan

**#Address for Correspondence:** Yu-Wen Chien

Department of Public Health, College of Medicine, National Cheng Kung University, Tainan, Taiwan

E-mail: yuwenchien@mail.ncku.edu.tw

**Supplementary Table 1.** List of ICD-9-CM and ICD-10-CM codes for identifying diseases in this study

|                         | ICD-9-CM (until 2015)                                                  | ICD-10-CM (since 2016)                          |
|-------------------------|------------------------------------------------------------------------|-------------------------------------------------|
| <b>Comorbidity</b>      |                                                                        |                                                 |
| Alcohol-related disease | 291, 303, 305.0, 790.3, V11.3                                          | not applicable                                  |
| COPD                    | 490, 491, 492, 493, 494, 495, 496                                      | not applicable                                  |
| Diabetes mellitus       | 250                                                                    | not applicable                                  |
| Dyslipidemia            | 272                                                                    | not applicable                                  |
| Hypertension            | 401, 402, 403, 404, 405                                                | not applicable                                  |
| <b>Outcome</b>          |                                                                        |                                                 |
| Acute cholecystitis     | 574.0, 574.1, 574.3, 574.4, 574.6, 574.7, 574.8, 575.0, 575.10, 575.12 | K80.0, K80.1, K80.4, K80.6, K81.0, K81.2, K81.9 |
| Acute pancreatitis      | 577.0                                                                  | K85                                             |
| Acute Appendicitis      | 540, 541, 542                                                          | K35                                             |
